# Supplementary material for: Noncanonical usage of stop codons in ciliates expands proteins with structurally flexible Q-rich motifs
Source: eLife journal article supplement (doi:10.7554/elife.91405), 2023-10-25

Figure 1

A

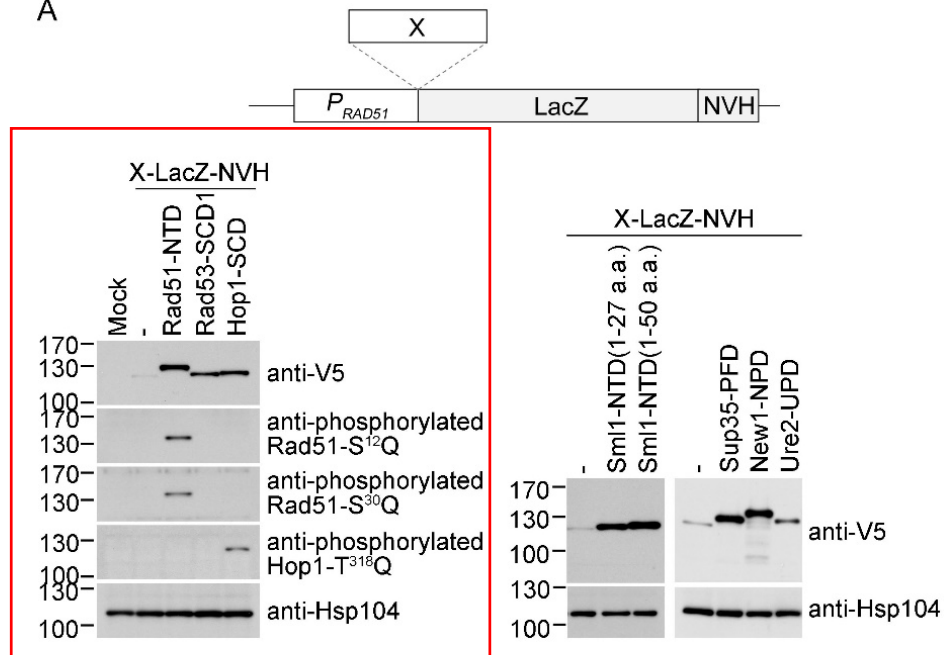

anti-V5

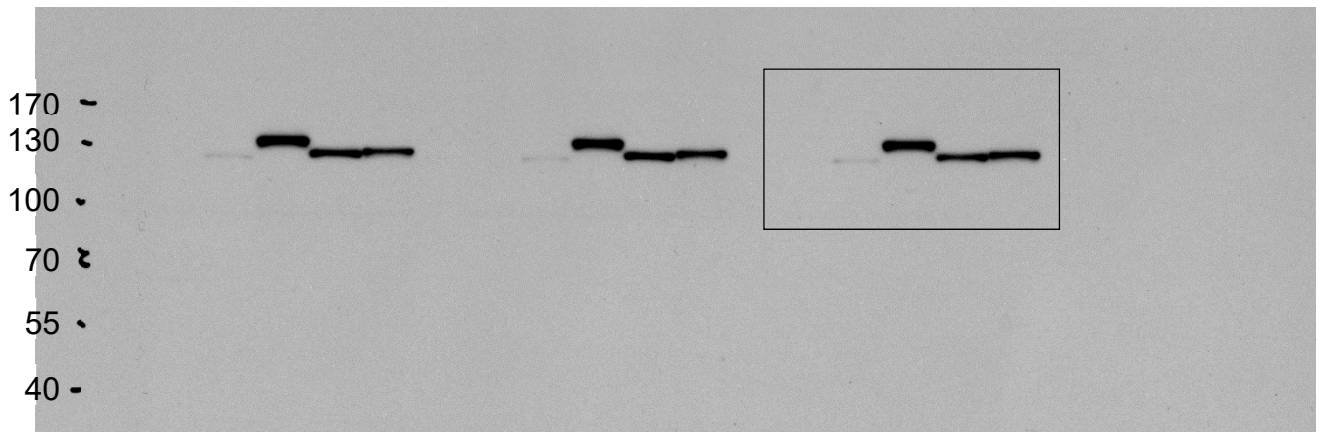

anti-phosphorylated  
Rad51-S<sup>12</sup>Q

anti-phosphorylated  
Rad51-S<sup>30</sup>Q

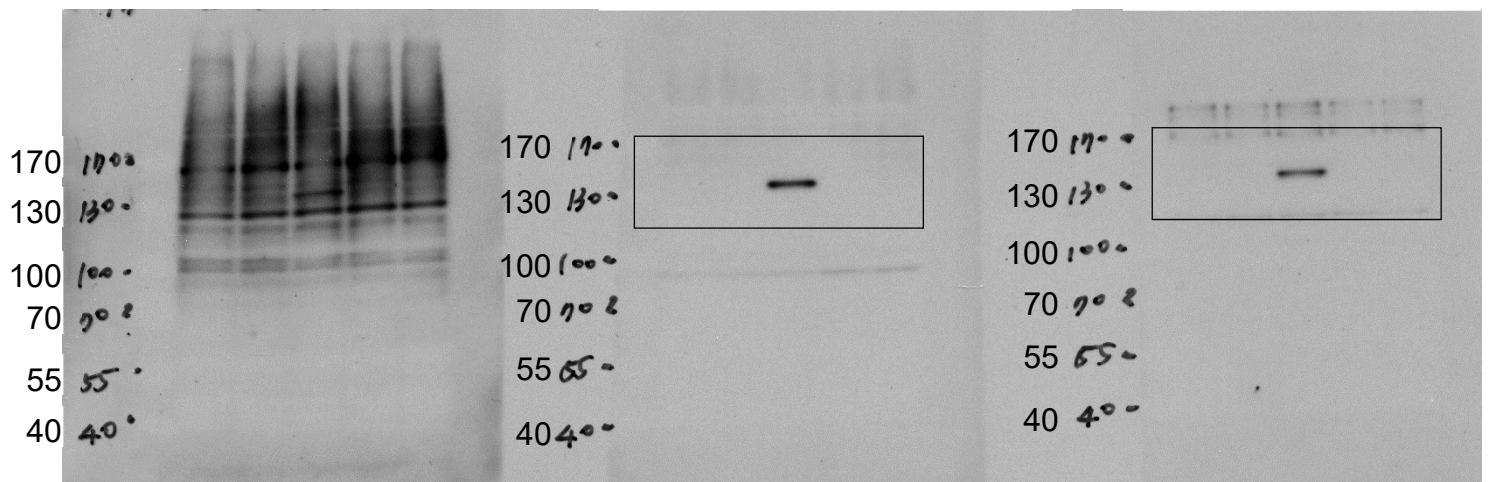

**anti-phosphorylated  
Hop1-T<sup>318</sup>Q**

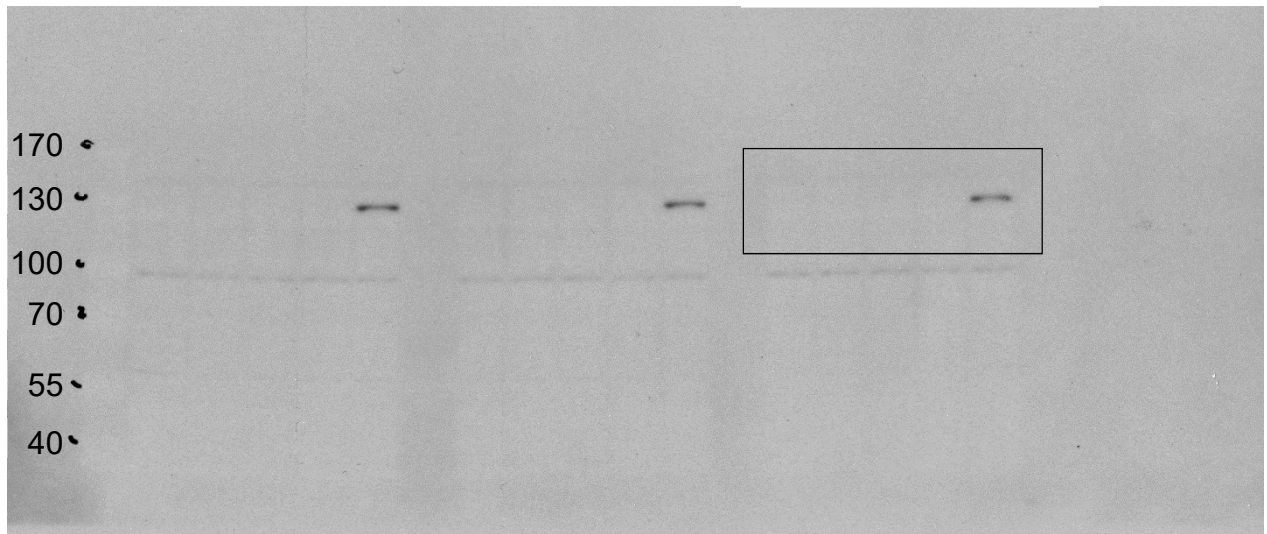

**anti-Hsp104**

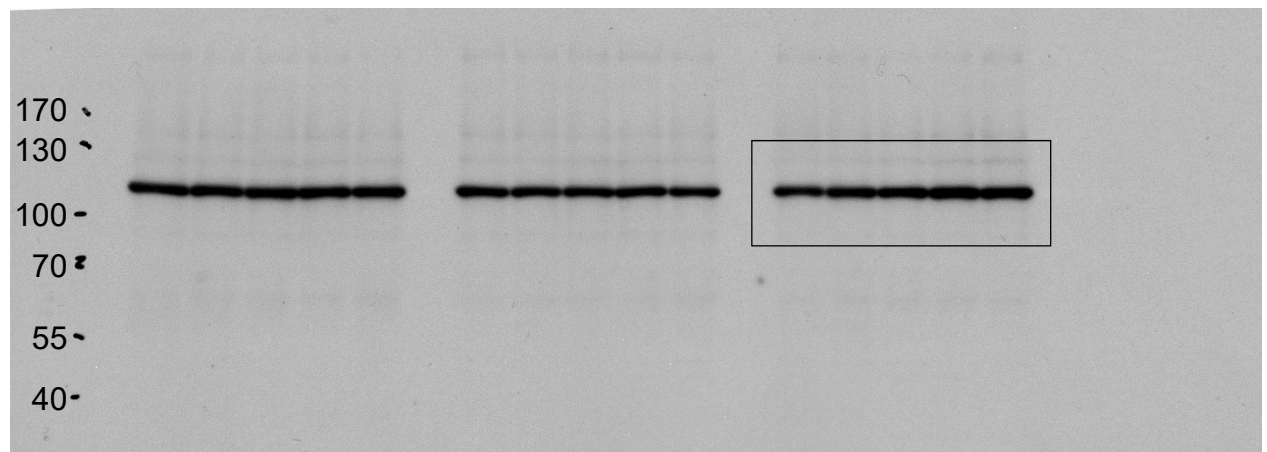



Figure 1

A

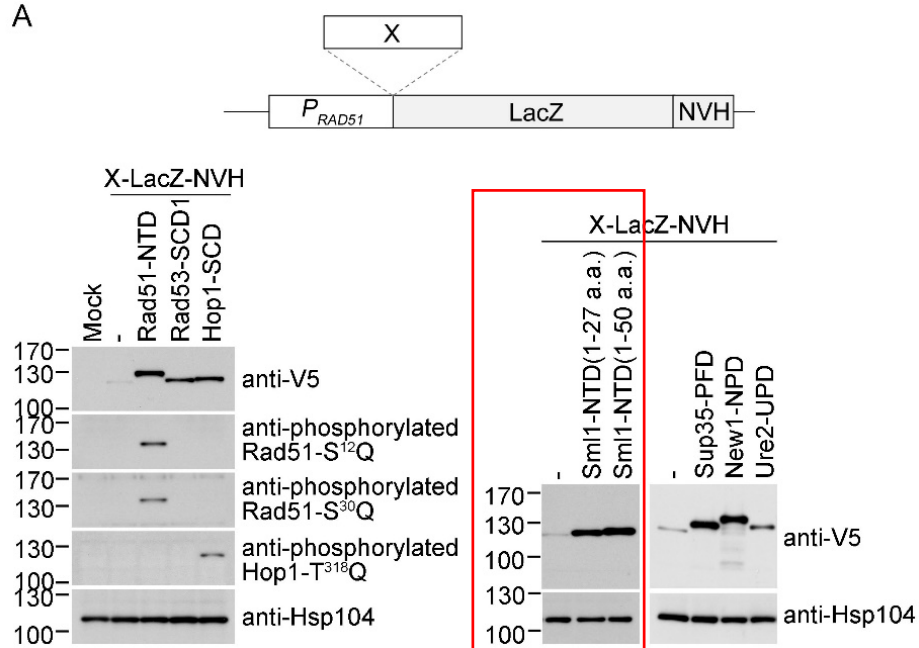

Sml1-NTD

anti-V5

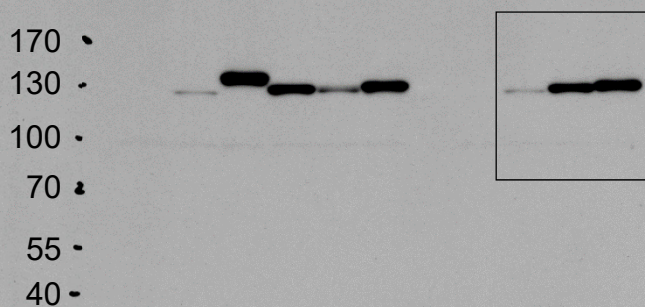

Sml1-NTD

anti-Hsp104

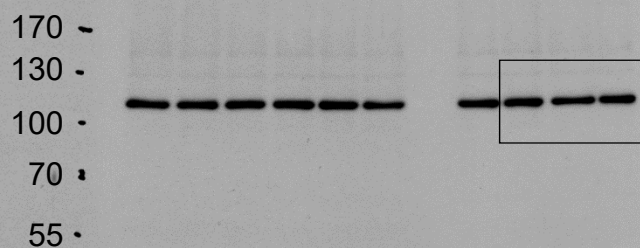

Figure 1

A

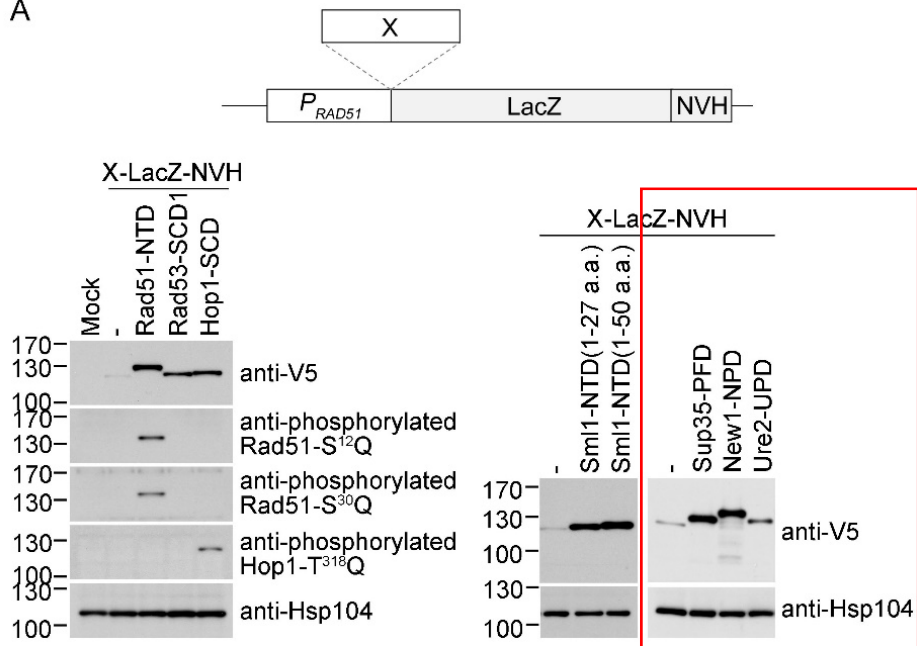

Sup35, New1 and Ure2

anti-V5

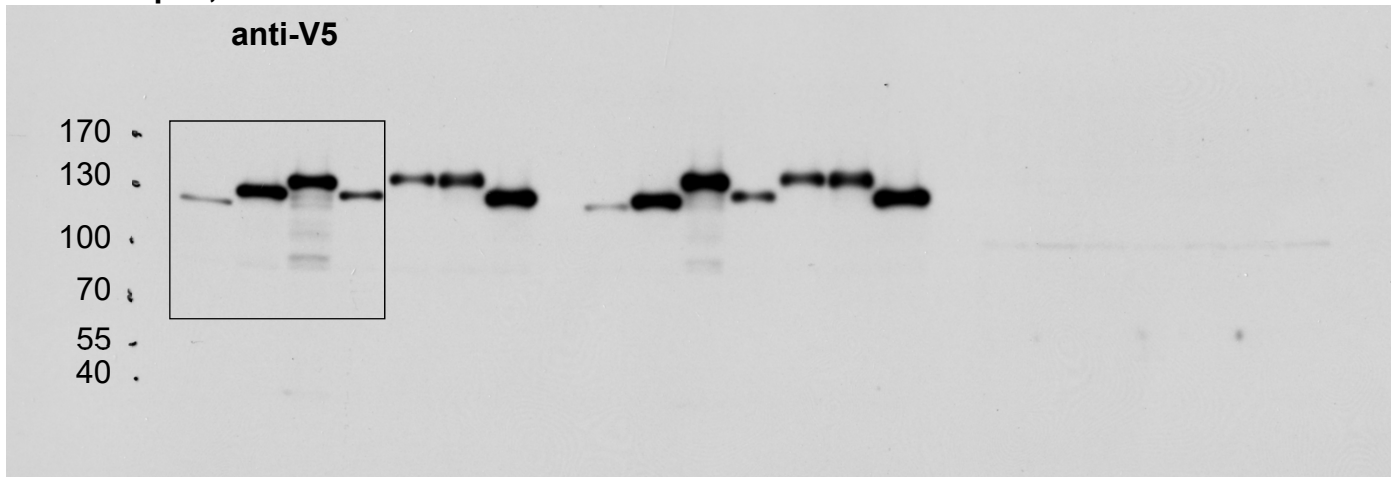

Sup35, New1 and Ure2

anti-Hsp104

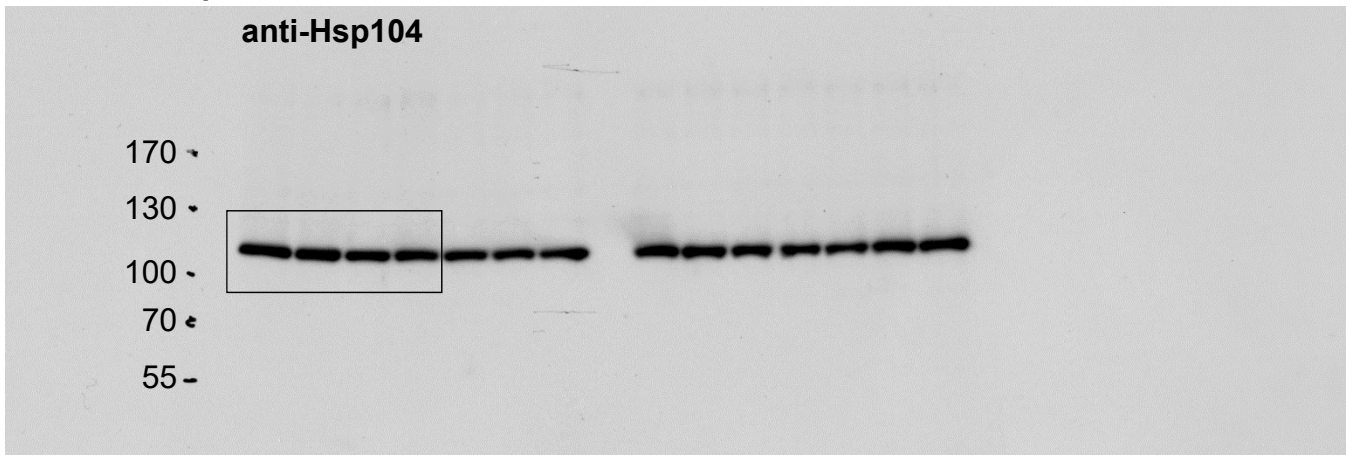

Figure 1

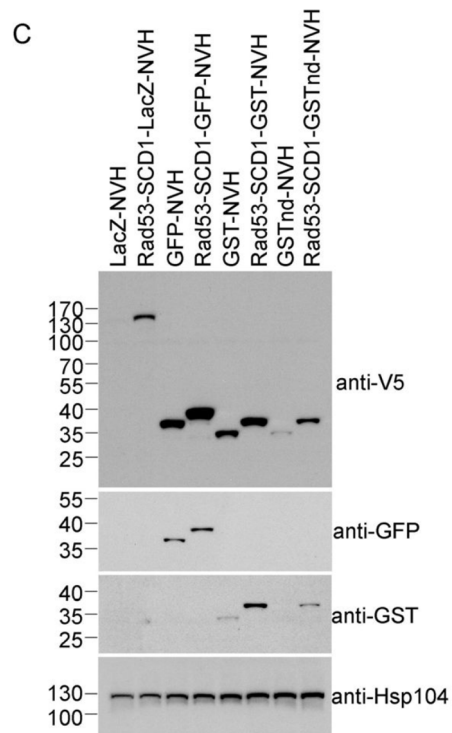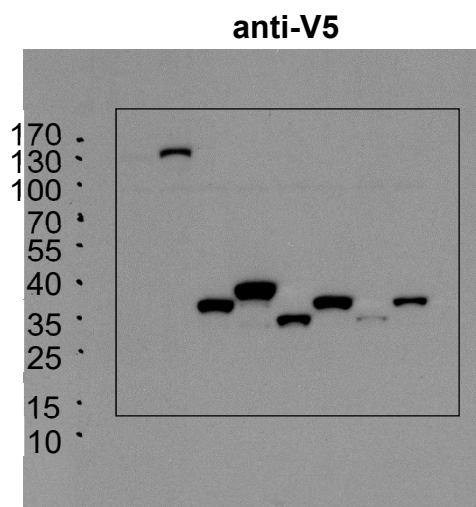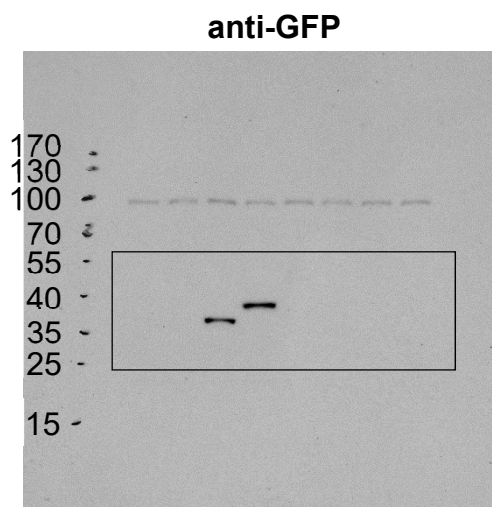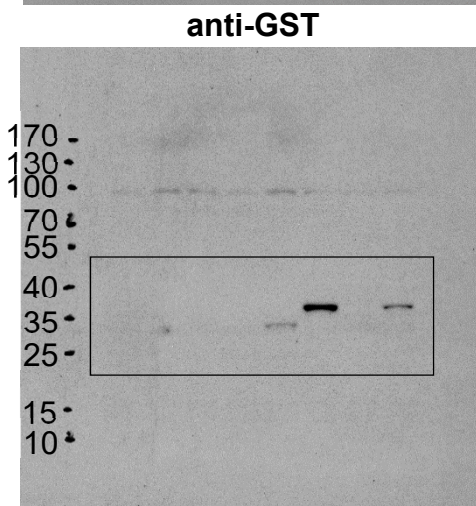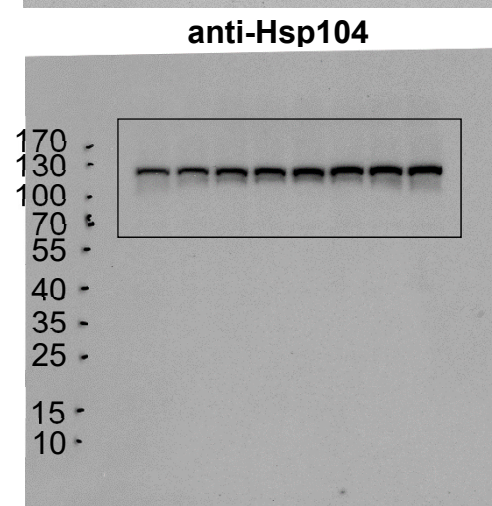



Figure 1

D

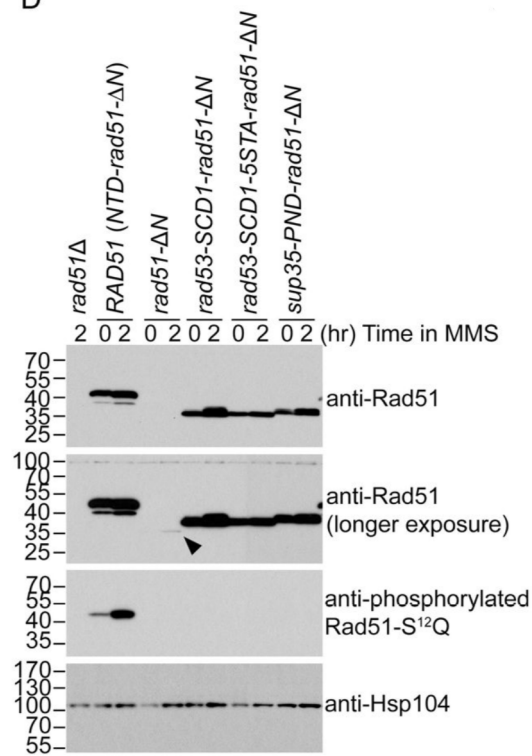

anti-Rad51

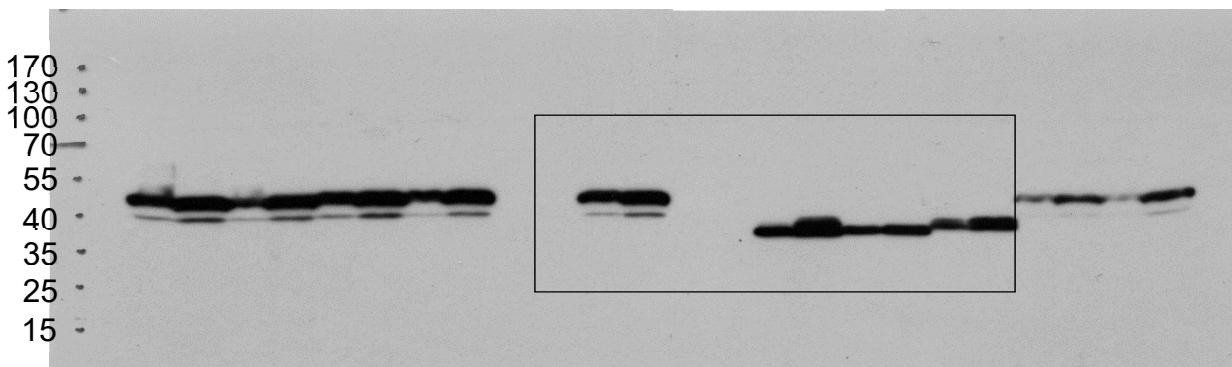

anti-Rad51 (longer exposure)

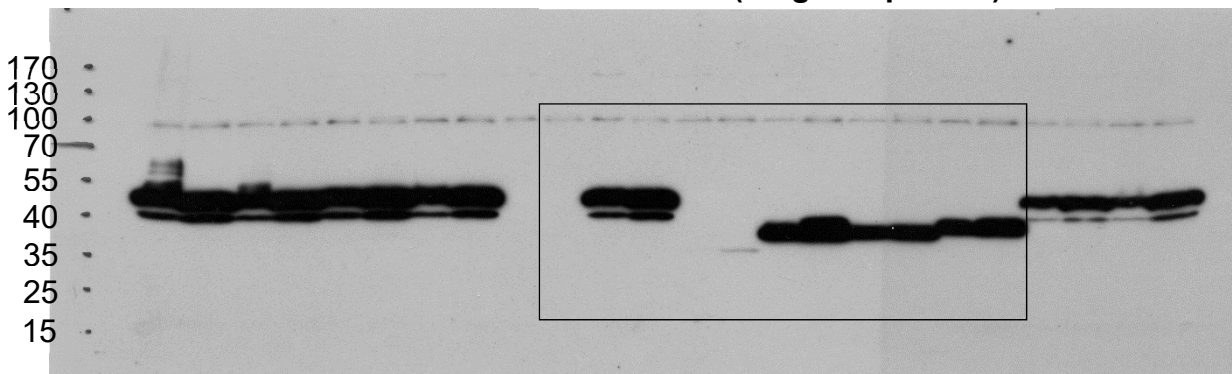

**anti-phosphorylated Rad51-S<sup>12</sup>Q**

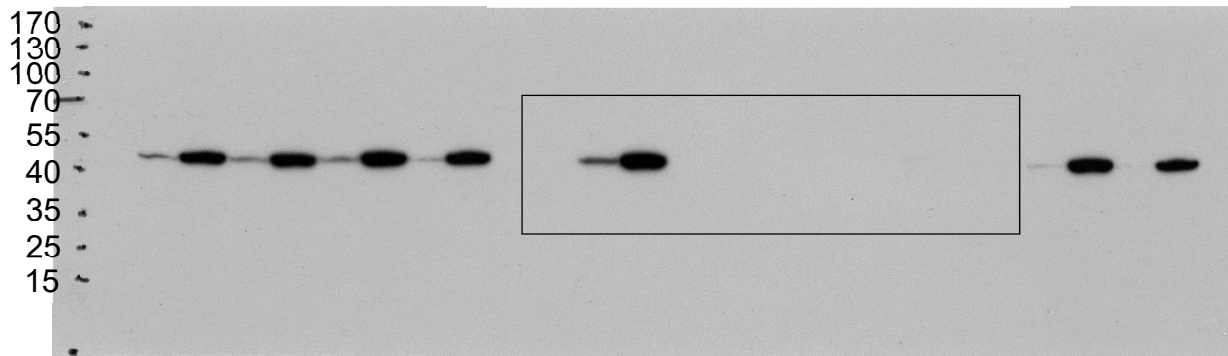

**anti-Hsp104**

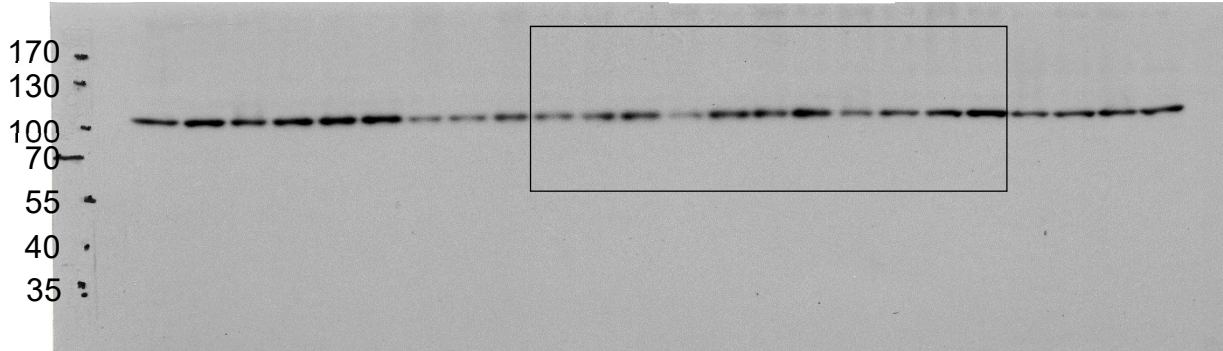

Supplement: fig1-data1 [file elife-91405-fig1-data1-v1.zip]
