# Supplementary material for: Noncanonical usage of stop codons in ciliates expands proteins with structurally flexible Q-rich motifs
Source: eLife journal article supplement (doi:10.7554/elife.91405), 2023-10-25

Figure 5

A

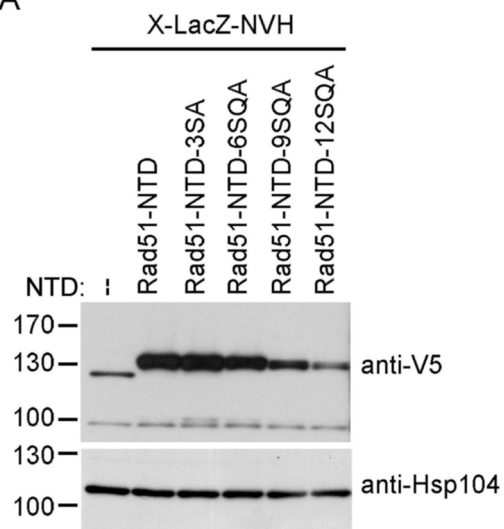

anti-V5

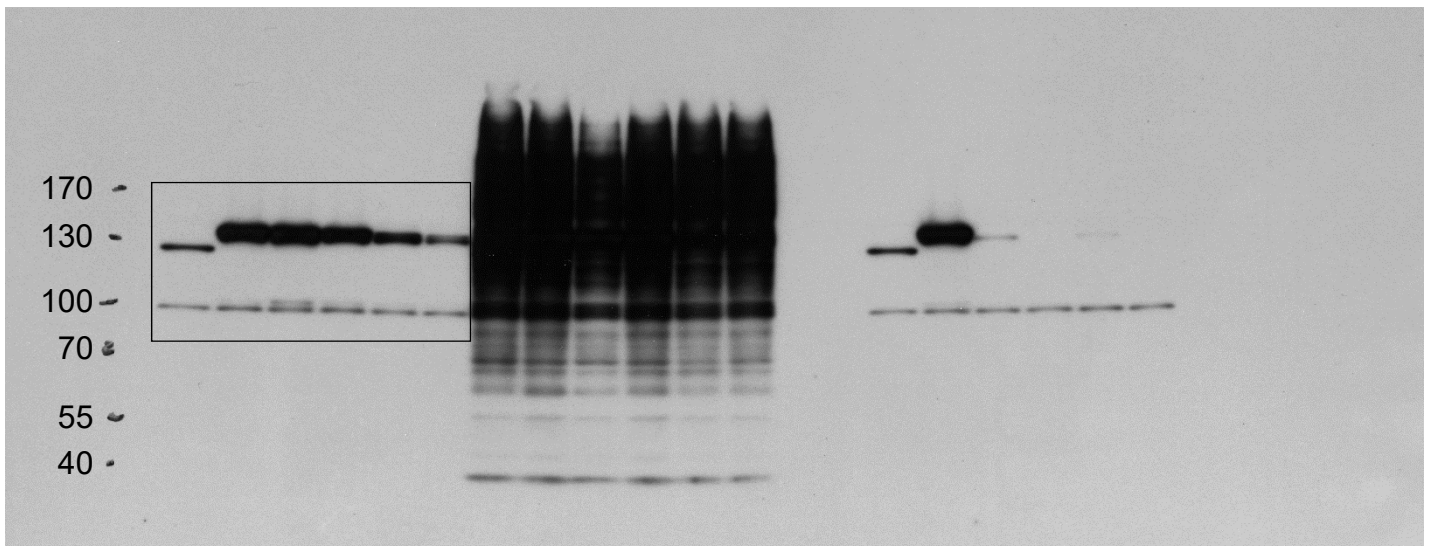

anti-Hsp104

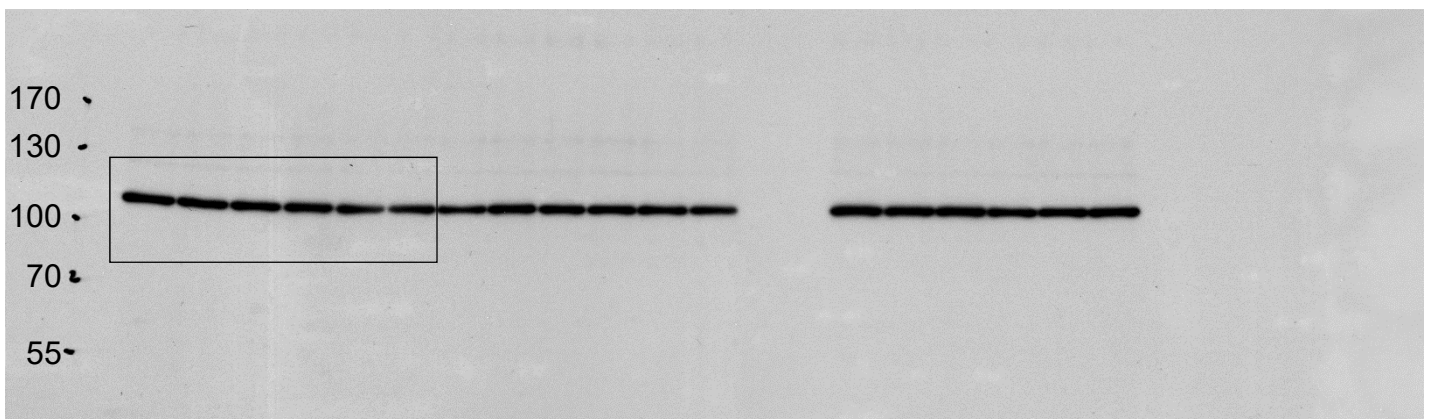

Figure 5

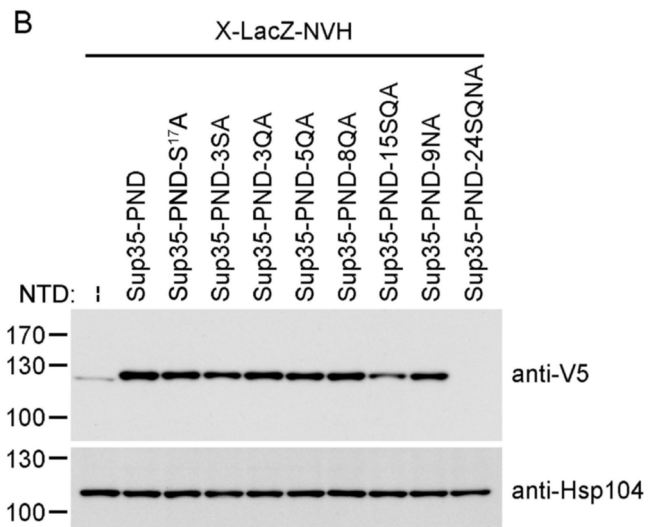

**anti-V5**

**anti-Hsp104**

longer exposure

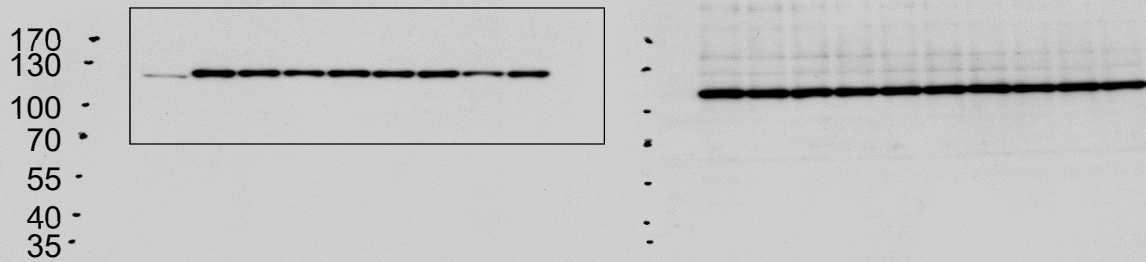

**anti-V5**

**anti-Hsp104**

shorter exposure

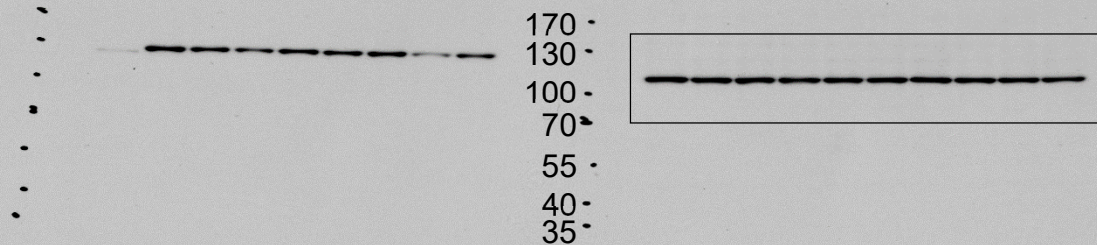

**Figure 5**

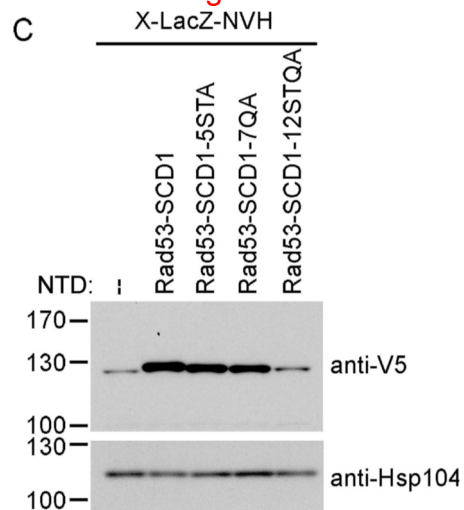

**anti-V5**

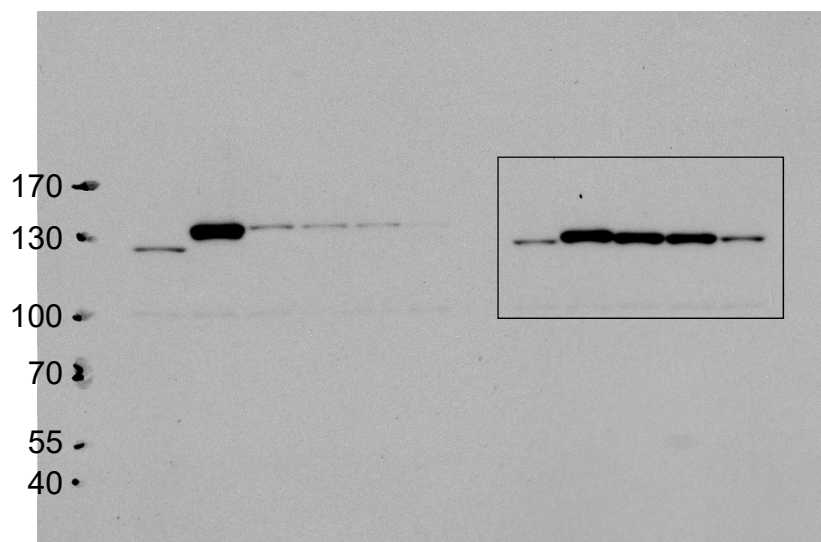

**anti-Hsp104**

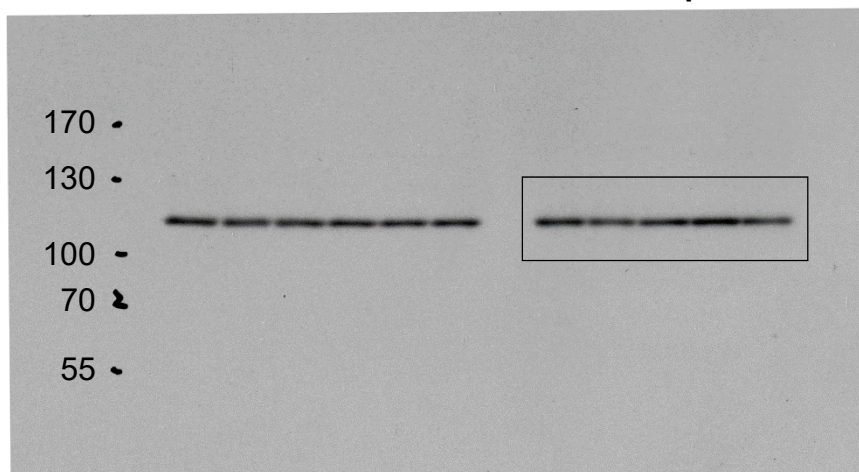

Supplement: fig5-data1 [file elife-91405-fig5-data1-v1.zip]
