# Supplementary material for: Noncanonical usage of stop codons in ciliates expands proteins with structurally flexible Q-rich motifs
Source: eLife. 2024 Feb 23;12:RP91405. doi: 10.7554/eLife.91405 (PMC10942620; doi:10.7554/eLife.91405)
Supplement: Source data 1. [file elife-91405-data1.xlsx]

## Sheet: Figure 1B
Figure 1B. N-terminal fusion of Rad51-NTD/SCD, Rad53-SCD1, Hop1-SCD, Sml1-NTD, Sup35-PFD, Ure2-UPD and New1-NPD promotes high-level expression of LacZ-NVH, respectively.
X-LacZ-NVH	Cell number (OD600)	Total reaction time (min)	OD420	β-galactosidase activity (unit)	Mean	SD	P value (compare to LacZ-NVH)
Mock (no vector)	0.1982	240	0.00556667	0.117025	0.0849741	0.035997	2.0319e-13
	0.218	240	0.0049	0.0936544
	0.2265	240	0.0009	0.0165563
	0.23	240	0.0043	0.0778986
	0.23	240	0.0059	0.106884
	0.23	240	0.0054	0.0978261
LacZ-NVH	0.2004	240	0.160433	3.33569	3.15073	0.142783	-
	0.2049	240	0.1521	3.09297
	0.2071	240	0.165267	3.32502
	0.2294	240	0.1653	3.0024
	0.2294	240	0.1686	3.06234
	0.2294	240	0.1699	3.08595
Rad51-NTD	0.2014	48	0.314167	32.4982	33.5562	0.968293	1.15968e-11
	0.1989	47	0.321567	34.3984
	0.2277	46	0.353733	33.7719
Rad53-SCD1	0.2204	48	0.2413	22.8089	23.1449	1.28945	1.48097e-09
	0.1846	47	0.213167	24.5691
	0.2327	46	0.2361	22.0568
Hop1-SCD	0.2057	48	0.223667	22.653	21.9493	0.725703	5.11187e-11
	0.2282	47	0.235867	21.9914
	0.2259	46	0.220333	21.2034
Sml1-NTD(1-27aa)	0.2593	48	0.2552	20.5039	20.528	0.134202	5.2387e-14
	0.2593	48	0.2573	20.6726
	0.2593	48	0.254	20.4075
Sml1-NTD(1-50aa)	0.2319	48	0.3181	28.5773	28.5294	0.352815	9.70019e-14
	0.2319	48	0.3212	28.8558
	0.2319	48	0.3134	28.1551
LacZ assay	Cell number (OD600)	Total reaction time (min)	OD420	β-galactosidase unit	Mean	SD	P value (compare to LacZ-NVH)
LacZ-NVH	0.242	240	0.1821	3.13533	2.93799	0.173183	-
	0.2155	240	0.1483	2.86736
	0.2321	240	0.1566	2.81129
Sup35-PFD	0.2392	50	0.2538	21.2207	20.9122	0.522751	5.86188e-07
	0.2268	50	0.2303	20.3086
	0.2369	50	0.2512	21.2073
New1-NPD	0.2458	40	0.3741	38.0492	35.8131	2.5436	2.37943e-05
	0.2444	40	0.3553	36.3441
	0.2638	40	0.3487	33.0459
Ure2-UPD	0.2562	80	0.1924	9.3872	9.27736	0.240742	3.17748e-06
	0.2333	80	0.168	9.00129
	0.2278	80	0.1721	9.44359
*β-galactosidase activity(unit) = (1000*OD420)/(Time(min)*OD600)

## Sheet: Figure2A-galatosidase activity
Figure 2A.The effects of WT and mutant Rad51-NTD on β-galactosidase activities
	Cell number (OD600)	Total reaction time (min)	OD420	β-galactosidase activity (unit)	Mean	SD	P value (compare to Rad51-NTD)
LacZ-NVH	0.2539	240	0.1546	2.53709	2.65955	0.158477	-
	0.256	240	0.1744	2.83854
	0.2742	240	0.1713	2.60303
Rad51-NTD-LacZ-NVH	0.2478	44	0.3009	27.5974	27.4596	0.895971	-
	0.2733	44	0.3187	26.5027
	0.2657	44	0.3306	28.2786
Rad51-NTD-3SA-LacZ-NVH	0.2542	44	0.2376	21.2431	22.1553	0.847261	0.00173387
	0.2639	44	0.259	22.3053
	0.2388	44	0.2408	22.9176
Rad51-NTD-6SQA-LacZ-NVH	0.2824	60	0.2783	16.4247	15.8931	0.469897	3.83699e-05
	0.2676	60	0.2494	15.5331
	0.2698	60	0.2545	15.7215
Rad51-NTD-9SQA-LacZ-NVH	0.2929	131	0.257	6.69796	6.4514	0.256122	2.56957e-06
	0.2812	131	0.2279	6.18668
	0.2833	131	0.2401	6.46955
Rad51-NTD-12SQA-LacZ-NVH	0.2967	240	0.2504	3.51646	3.40007	0.161383	1.36235e-06
	0.2752	240	0.2124	3.21584
	0.2904	240	0.2417	3.46792
*β-galactosidase activity(unit) = (1000*OD420)/(Time(min)*OD600)

## Sheet: Figure 2B-plasmid copy number
Figure 2B. The relative quantification values were determined to reveal the plasmid DNA copy number by g-qPCR.
Sample Name	LacZ Ct	ACT1 Ct	LacZ EQ.Ct Mean	ACT1 EQ.Ct Mean	∆Ct	∆∆Ct	RQ(2-∆∆Ϲt)		Sample Name		RQ	control mean	normalized to control mean	mean	SD
LacZ-NVH-1	26.306	21.621	26.2657	21.6453	4.62033	0	1		LacZ-NVH	1	1	1.0803	0.925669	1	0.082476
	26.278	21.712								2	1.06475		0.985605
	26.213	21.603								3	1.17615		1.08873
LacZ-NVH-2	25.955	21.451	26.0137	21.4837	4.53	-0.0903333	1.06462		Rad51-NTD-LacZ-NVH	1	0.660883		0.611759	0.958619	0.302158
	25.987	21.481								2	1.18769		1.0994
	26.099	21.519								3	1.25822		1.1647
Rad51-NTD-LacZ-NVH-2	25.47	20.95	25.4017	21.029	4.37267	-0.247667	1.18729		Rad51-NTD-3SA-LacZ-NVH	1	1.01941		0.943633	0.94271	0.237979
	25.224	21.088								2	1.275		1.18023
	25.511	21.049								3	0.760824		0.704272
Rad51-NTD-3SA- LacZ-NVH-1	25.816	21.119	25.7787	21.186	4.59267	-0.0276667	1.01936		Rad51-NTD-6SQA-LacZ-NVH	1	0.804255		0.744474	0.884606	0.188029
	25.714	21.152								2	0.876178		0.811051
	25.806	21.287								3	1.18649		1.09829
Rad51-NTD-3SA- LacZ-NVH-2	25.465	21.103	25.373	21.103	4.27	-0.350333	1.27486		Rad51-NTD-9SQA-LacZ-NVH	1	1.30521		1.20819	1.01777	0.170021
	25.193	21.108								2	0.95196		0.8812
	25.461	21.098								3	1.0413		0.963901
Rad51-NTD-6SQA- LacZ-NVH-1	26.165	21.221	26.1757	21.2407	4.935	0.314667	0.804037		Rad51-NTD-12SQA-LacZ-NVH	1	1.37636		1.27405	1.10418	0.196513
	26.213	21.242								2	0.960337		0.888955
	26.149	21.259								3	1.24184		1.14954
Rad51-NTD-6SQA- LacZ-NVH-2	25.981	21.144	25.979	21.1673	4.81167	0.191333	0.875796
	25.888	21.155
	26.068	21.203
Rad51-NTD-9SQA- LacZ-NVH-1	25.231	20.983	25.2443	21.008	4.23633	-0.384	1.30495
	25.193	21.069
	25.309	20.972
Rad51-NTD-9SQA- LacZ-NVH-2	25.839	21.187	25.9337	21.242	4.69167	0.0713333	0.951758
	25.979	21.356
	25.983	21.183
Rad51-NTD-12SQA- LacZ-NVH-1	25.624	21.469	25.6637	21.5033	4.16033	-0.46	1.37554
	25.57	21.545
	25.797	21.496
Rad51-NTD-12SQA- LacZ-NVH-2	25.954	21.208	25.9407	21.2617	4.679	0.0586667	0.960151
	25.958	21.201
	25.91	21.376
Sample Name	LacZ Ct	ACT1 Ct	LacZ EQ.Ct Mean	ACT1 EQ.Ct Mean	∆Ct	∆∆Ct	RQ(2-∆∆Ϲt)
LacZ-NVH-1	26.108	21.666	26.172	21.6437	4.52833	0	1
	26.268	21.61
	26.14	21.655
LacZ-NVH-3	25.872	21.451	25.778	21.484	4.294	-0.234333	1.17636
	25.698	21.558
	25.764	21.443
Rad51-NTD-LacZ-NVH-3	25.712	21.438	25.6513	21.4553	4.196	-0.332333	1.25905
	25.749	21.466
	25.493	21.462
Rad51-NTD-3SA- LacZ-NVH-3	25.882	20.973	25.91	20.988	4.922	0.393667	0.761193
	25.962	20.973
	25.886	21.018
Rad51-NTD-6SQA- LacZ-NVH-3	26.473	22.096	26.3473	22.066	4.28133	-0.247	1.18674
	26.282	22.045
	26.287	22.057
Rad51-NTD-9SQA- LacZ-NVH-3	25.993	21.485	25.9563	21.487	4.46933	-0.059	1.04174
	25.997	21.544
	25.879	21.432
Rad51-NTD-12SQA- LacZ-NVH-3	25.734	21.501	25.719	21.5033	4.21567	-0.312667	1.242
	25.773	21.53
	25.65	21.479
Sample Name	LacZ Ct	ACT1 Ct	LacZ EQ.Ct Mean	ACT1 EQ.Ct Mean	∆Ct	∆∆Ct	RQ(2-∆∆Ϲt)
LacZ-NVH-1	26.465	21.724	26.5063	21.8037	4.70267	0	1
	26.508	21.849
	26.546	21.838
Rad51-NTD-LacZ-NVH-1	26.306	20.969	26.2933	20.9927	5.30067	0.598	0.660669
	26.244	20.995
	26.33	21.014

## Sheet: Figure 2C mRNA-RT-qPCR
Figure 2C. The relative quantification values were determined to reveal the steady-state levels of LacZ-NVH mRNA by RT-qPCR.
Sample Name	LacZ Ct	ACT1 Ct	LacZ EQ.Ct Mean	ACT1 EQ.Ct Mean	∆Ct	∆∆Ct	RQ(2-∆∆Ϲt)		Sample Name		RQ	control mean	normalized to control mean	mean	SD
LacZ-NVH-1	23.96	17.463	23.84	17.4787	6.36133	0	1		LacZ-NVH	1	1	1.07096	0.933744	1	0.197802
	23.851	17.518								2	0.903707		0.843831
	23.709	17.455								3	1.30916		1.22242
LacZ-NVH-2	23.528	17.101	23.6093	17.1023	6.507	0.145667	0.903962		Rad51-NTD-LacZ-NVH	1	0.439326		0.410218	0.503107	0.116699
	23.706	17.038								2	0.498003		0.465007
	23.594	17.168								3	0.679087		0.634094
Rad51-NTD-LacZ-NVH-1	24.714	16.983	24.6043	17.0563	7.548	1.18667	0.439317		Rad51-NTD-3SA-LacZ-NVH	1	0.43838		0.409335	0.495153	0.135123
	24.598	17.088								2	0.697097		0.65091
	24.501	17.098								3	0.455385		0.425213
Rad51-NTD-LacZ-NVH-2	23.961	16.67	24.0203	16.654	7.36633	1.005	0.49827		Rad51-NTD-6SQA-LacZ-NVH	1	0.607529		0.567277	0.67143	0.0903734
	23.991	16.639								2	0.768837		0.717898
	24.109	16.653								3	0.780852		0.729116
Rad51-NTD-3SA- LacZ-NVH-1	24.582	16.926	24.4717	16.9207	7.551	1.18967	0.438404		Rad51-NTD-9SQA-LacZ-NVH	1	0.827634		0.772799	0.78789	0.0253548
	24.447	16.894								2	0.828609		0.773709
	24.386	16.942								3	0.875146		0.817163
Rad51-NTD-3SA- LacZ-NVH-2	23.59	16.746	23.6173	16.7353	6.882	0.520667	0.69705		Rad51-NTD-12SQA-LacZ-NVH	1	1.43824		1.34295	1.13703	0.2363
	23.578	16.768								2	0.941408		0.879034
	23.684	16.692								3	1.27347		1.1891
Rad51-NTD-6SQA- LacZ-NVH-1	24.152	17.08	24.1063	17.0263	7.08	0.718667	0.607659
	24.092	16.998
	24.075	17.001
Rad51-NTD-6SQA- LacZ-NVH-2	23.797	17.133	23.861	17.121	6.74	0.378667	0.769148
	23.897	17.15
	23.889	17.08
Rad51-NTD-9SQA- LacZ-NVH-1	23.792	17.098	23.756	17.1223	6.63367	0.272333	0.827979
	23.709	17.136
	23.767	17.133
Rad51-NTD-12SQA- LacZ-NVH-1	23.642	17.85	23.611	17.7743	5.83667	-0.524667	1.4386
	23.605	17.733
	23.586	17.74
Rad51-NTD-12SQA- LacZ-NVH-2	23.449	17.072	23.5383	17.0903	6.448	0.0866667	0.941696
	23.63	17.11
	23.536	17.089
Sample Name	LacZ Ct	ACT1 Ct	LacZ EQ.Ct Mean	ACT1 EQ.Ct Mean	∆Ct	∆∆Ct	RQ(2-∆∆Ϲt)
LacZ-NVH-1	24.09	17.382	24.097	17.4317	6.66533	0	1
	24.093	17.459
	24.108	17.454
LacZ-NVH-3	23.723	17.275	23.605	17.3287	6.27633	-0.389	1.30949
	23.5	17.468
	23.592	17.243
Rad51-NTD-LacZ-NVH-3	23.916	16.644	23.858	16.635	7.223	0.557667	0.6794
	23.877	16.699
	23.781	16.562
Rad51-NTD-3SA- LacZ-NVH-3	24.919	17.087	24.8827	17.0823	7.80033	1.135	0.455335
	24.989	17.1
	24.74	17.06
Rad51-NTD-6SQA- LacZ-NVH-3	24.227	17.127	24.1727	17.1507	7.022	0.356667	0.780967
	24.135	17.155
	24.156	17.17
Rad51-NTD-9SQA- LacZ-NVH-2	23.908	17.081	23.996	17.0597	6.93633	0.271	0.828745
	24.04	17.059
	24.04	17.039
Rad51-NTD-9SQA- LacZ-NVH-3	24.187	17.3	24.1793	17.3217	6.85767	0.192333	0.875189
	24.115	17.333
	24.236	17.332
Rad51-NTD-12SQA- LacZ-NVH-3	23.941	17.679	23.905	17.5887	6.31633	-0.349	1.27368
	23.911	17.557
	23.863	17.53

## Sheet: Figure 2D
Figure 2D. The relative ratios of LacZ-NVH mRNA versus plasmid DNA copy number.
Sample Name		cDNA RQ	gDNA RQ	cDNA RQ/ gDNA RQ	control mean	normalized to control mean	mean	SD
LacZ-NVH	1	1	1	1	0.987281	1.01288	1	0.134337
	2	0.903707	1.06475	0.848752		0.859686
	3	1.30916	1.17615	1.11309		1.12743
Rad51-NTD-LacZ-NVH	1	0.439326	0.660883	0.664756		0.67332	0.548234	0.124314
	2	0.498003	1.18769	0.419305		0.424707
	3	0.679087	1.25822	0.539721		0.546674
Rad51-NTD-3SA-LacZ-NVH	1	0.43838	1.01941	0.430035		0.435575	0.531871	0.0874237
	2	0.697097	1.275	0.546744		0.553787
	3	0.455385	0.760824	0.598542		0.606252
Rad51-NTD-6SQA-LacZ-NVH	1	0.607529	0.804255	0.755394		0.765125	0.773506	0.111335
	2	0.768837	0.876178	0.87749		0.888795
	3	0.780852	1.18649	0.658121		0.666599
Rad51-NTD-9SQA-LacZ-NVH	1	0.827634	1.30521	0.6341		0.642269	0.791722	0.130319
	2	0.828609	0.95196	0.870424		0.881638
	3	0.875146	1.0413	0.840434		0.851261
Rad51-NTD-12SQA-LacZ-NVH	1	1.43824	1.37636	1.04496		1.05842	1.03001	0.0336038
	2	0.941408	0.960337	0.980289		0.992917
	3	1.27347	1.24184	1.02547		1.03868

## Sheet: Figure 3B-D
Figure 3. The impact of six protein homeostasis genes on the β-galactosidase activity ratios of Rad51-NTD-LacZ-NVH toLacZ-NVH in WT and the six gene knockout mutants
	Cell number (OD600)	Total reaction time (min)	OD420	β-galactosidase activity (unit)	Mean	SD	P value (compare to WT+LacZ-NVH )	P value (compare to WT+Rad51-NTD-LacZ-NVH )	Rad51-NTD-LacZ-NVH/LacZ-NVH	Rad51-NTD-LacZ-NVH/LacZ-NVH SD
WT+LacZ-NVH	0.3021	240	0.1607	2.21643	2.53692	0.234644	-	-	-	-			Rad51-LacZ-NVH/LacZ-NVH SD calculation:
	0.3284	240	0.1856	2.35485									WT+Rad51-NTD-LacZ-NVH/WT+LacZ-NVH SD :
	0.3151	240	0.1842	2.43573										Rad51-NTD-NVH	LacZ-NVH
	0.2868	240	0.1934	2.80974										24.2631	2.21643
	0.2801	240	0.1815	2.69993										24.8432	2.35485
	0.2836	240	0.1841	2.70481										25.5263	2.43573
WT+Rad51-NTD-LacZ-NVH	0.3223	35	0.2737	24.2631	24.7755	1.2998	-	-	9.766	0.424026				26.5003	2.80974
	0.3257	35	0.2832	24.8432										24.8959	2.69993
	0.304	35	0.2716	25.5263										22.6244	2.70481
	0.2831	45	0.3376	26.5003
	0.2801	45	0.3138	24.8959									Mean	24.7755	2.53692
	0.2818	45	0.2869	22.6244									σ2	1.68947	0.055058
hsp104∆+LacZ-NVH	0.3354	240	0.1268	1.57523	1.60278	0.0619449	0.000312744	-	-	-			sample SIZE	6	6
	0.3014	240	0.1128	1.55939
	0.3189	240	0.1281	1.67372										6.23799e-05	0.043751	0.135985
hsp104∆+Rad51-NTD-LacZ-NVH	0.3296	35	0.2218	19.2268	19.6812	0.893405	-	0.000534471	12.2794	0.422723			variance	0.179798
	0.3213	35	0.2329	20.7105									SD	0.424026
	0.3239	35	0.2166	19.1064
new1∆+LacZ-NVH	0.3286	240	0.1372	1.7397	1.6809	0.0524747	0.00051885	-	-	-
	0.3295	240	0.1316	1.66414
	0.3445	240	0.1355	1.63885
new1∆+Rad51-NTD-LacZ-NVH	0.322	35	0.3347	29.6983	27.5626	1.88674	-	0.0332754	16.3975	0.712361
	0.3313	35	0.3029	26.1222
	0.3353	35	0.3153	26.8672
doa4∆+LacZ-NVH	0.2945	240	0.0875	1.23797	1.16151	0.0673274	2.70301e-05	-	-	-
	0.2835	240	0.0756	1.11111
	0.2899	240	0.079	1.13545
doa4∆+Rad51-NTD-LacZ-NVH	0.2816	35	0.2972	30.1542	29.5822	1.2901	-	0.00119808	25.4687	1.06685
	0.2908	35	0.3103	30.4873
	0.2695	35	0.2651	28.105
doa1∆+LacZ-NVH	0.2784	240	0.0433	0.648048	0.657128	0.0171564	3.03613e-06	-	-	-
	0.2733	240	0.0424	0.64642
	0.2813	240	0.0457	0.676917
doa1∆+Rad51-NTD-LacZ-NVH	0.2968	49	0.28	19.253	19.3097	0.597072	-	0.000263277	29.3849	0.686618
	0.2921	49	0.2853	19.9331
	0.2684	49	0.2465	18.743
san1∆+LacZ-NVH	0.2801	240	0.1148	1.70772	1.6981	0.018218	0.000556146	-	-	-
	0.2764	240	0.1134	1.70948
	0.28	240	0.1127	1.67708
san1∆+Rad51-NTD-LacZ-NVH	0.2893	44	0.2768	21.7453	22.1443	0.419792	-	0.0127847	13.0406	0.164003
	0.2819	44	0.2801	22.5822
	0.2887	44	0.2808	22.1054
oaz1∆+LacZ-NVH	0.2884	240	0.1174	1.69614	1.85586	0.167198	0.0030519	-	-	-
	0.2794	240	0.1361	2.02965
	0.2993	240	0.1323	1.8418
oaz1∆+Rad51-NTD-LacZ-NVH	0.2809	44	0.2984	24.1432	23.3694	0.89476	-	0.140941	12.5922	0.711821
	0.2974	44	0.3085	23.5755
	0.2827	44	0.2785	22.3896
*β-galactosidase activity(unit) = (1000*OD420)/(Time(min)*OD600)

## Sheet: Figure 4A-D
Figure 4. List of N-terminal tags with their relative β-galactosidase activities.
X-LacZ-NVH	Cell number (OD600)	Total reaction time (min)	OD420	β-galactosidase unit	Mean	SD	Relative LacZ activity	Relative LacZ activity SD
LacZ-NVH	0.2004	240	0.160433	3.33569	3.15073	0.142783	-	-
	0.2049	240	0.1521	3.09297
	0.2071	240	0.165267	3.32502						Relative LacZ activity SD calculation:
	0.2294	240	0.1653	3.0024						Rad51-NTD-LacZ-NVH/LacZ-NVH SD :
	0.2294	240	0.1686	3.06234							Rad51-NTD-NVH	LacZ-NVH
	0.2294	240	0.1699	3.08595							32.4982	3.33569
Rad51-NTD	0.2014	48	0.314167	32.4982	33.5562	0.968293	10.6503	0.265175			34.3984	3.09297
	0.1989	47	0.321567	34.3984							33.7719	3.32502
	0.2277	46	0.353733	33.7719								3.0024
Rad53-SCD1	0.2204	48	0.2413	22.8089	23.1449	1.28945	7.3459	0.272615				3.06234
	0.1846	47	0.213167	24.5691								3.08595
	0.2327	46	0.2361	22.0568
Hop1-SCD	0.2057	48	0.223667	22.653	21.9493	0.725703	6.96642	0.185205		Mean	33.5562	3.15073
	0.2282	47	0.235867	21.9914						σ2	0.937591	0.0203869
	0.2259	46	0.220333	21.2034						sample SIZE	3	6
Sml1-NTD(1-27aa)	0.2593	48	0.2552	20.5039	20.528	0.134202	6.51533	0.123022
	0.2593	48	0.2573	20.6726							1.07758e-05	0.0314826	0.0388242
	0.2593	48	0.254	20.4075						variance	0.0703176
Sml1-NTD(1-50aa)	0.2319	48	0.3181	28.5773	28.5294	0.352815	9.05487	0.179568		SD	0.265175
	0.2319	48	0.3212	28.8558
	0.2319	48	0.3134	28.1551
X-LacZ-NVH	Cell number (OD600)	Total reaction time (min)	OD420	β-galactosidase unit	Mean	SD	relative LacZ activity	relative LacZ activity SD
LacZ-NVH	0.242	240	0.1821	3.13533	2.93799	0.173183	-	-
	0.2155	240	0.1483	2.86736
	0.2321	240	0.1566	2.81129
Sup35-PFD	0.2392	50	0.2538	21.2207	20.9122	0.522751	7.11785	0.263144
	0.2268	50	0.2303	20.3086
	0.2369	50	0.2512	21.2073
New1-NPD	0.2458	40	0.3741	38.0492	35.8131	2.5436	12.1896	0.649794
	0.2444	40	0.3553	36.3441
	0.2638	40	0.3487	33.0459
Ure2-UPD	0.2562	80	0.1924	9.3872	9.27736	0.240742	3.15772	0.117429
	0.2333	80	0.168	9.00129
	0.2278	80	0.1721	9.44359
X-LacZ-NVH	Cell number (OD600)	Total reaction time (min)	OD420	β-galactosidase activity (unit)	Mean	SD	relative LacZ activity	relative LacZ activity SD
LacZ-NVH	0.2303	240	0.1653	2.99066	3.0558	0.0574414	-	-
	0.2303	240	0.1701	3.07751
	0.2303	240	0.1713	3.09922
Rad51-NTD	0.2285	44	0.3113	30.9628	31.9176	0.889679	10.445	0.202751
	0.2285	44	0.329	32.7233
	0.2285	44	0.3224	32.0668
Rad51-NTD-3SA	0.2223	44	0.2532	25.8864	26.2136	0.337846	8.5783	0.112881
	0.2223	44	0.2562	26.1931
	0.2223	44	0.2598	26.5612
Rad51-NTD-8STA	0.2369	90	0.2338	10.9657	11.1377	0.173559	3.64477	0.0513817
	0.2369	90	0.2374	11.1346
	0.2369	90	0.2412	11.3128
Rad51-NTD-11STA	0.2039	90	0.2072	11.2909	11.7251	0.387871	3.83699	0.0842915
	0.2039	90	0.2174	11.8468
	0.2039	90	0.2209	12.0375
Rad51-NTD-6SQA	0.2342	52	0.2288	18.7874	19.1788	0.371448	6.27619	0.0978024
	0.2342	52	0.2378	19.5264
	0.2342	52	0.2341	19.2226
Rad51-NTD-9SQA	0.2101	130	0.2292	8.39161	8.58566	0.289841	2.80963	0.0626813
	0.2101	130	0.2307	8.44653
	0.2101	130	0.2436	8.91883
Rad51-NTD-12SQA	0.2343	240	0.2375	4.22357	4.27218	0.0574693	1.39806	0.0186581
	0.2343	240	0.2394	4.25736
	0.2343	240	0.2438	4.33561
Rad51-NTD-3QA	0.2223	52	0.2999	25.9438	26.3648	0.381552	8.6278	0.118174
	0.2223	52	0.3059	26.4629
	0.2223	52	0.3085	26.6878
Rad51-NTD-9QA	0.2564	90	0.2519	10.9161	10.9869	0.2524	3.59542	0.0616193
	0.2564	90	0.26	11.2671
	0.2564	90	0.2487	10.7774
Rad51-NTD-4NA	0.2202	44	0.3329	34.3593	35.068	0.615937	11.4759	0.170457
	0.2202	44	0.3427	35.3707
	0.2202	44	0.3437	35.4739
Rad51-NTD-13QNA	0.2219	90	0.2337	11.702	11.9824	0.264628	3.92119	0.0656587
	0.2219	90	0.2442	12.2277
	0.2219	90	0.24	12.0174
X-LacZ-NVH	Cell number (OD600)	Total reaction time (min)	OD420	β-galactosidase activity (unit)	Mean	SD	relative LacZ activity	relative LacZ activity SD
LacZ-NVH	0.2266	240	0.2035	3.74191	3.81301	0.0667385	-	-
	0.2266	240	0.2107	3.8743
	0.2266	240	0.2079	3.82282
Rad53-SCD1	0.2387	44	0.2509	23.8889	24.6284	0.651378	6.45903	0.118275
	0.2387	44	0.2613	24.8791
	0.2387	44	0.2638	25.1171
Rad53-SCD1-5STA	0.2121	78	0.3342	20.2009	20.3601	0.18137	5.33964	0.0605457
	0.2121	78	0.3362	20.3218
	0.2121	78	0.3401	20.5576
Rad53-SCD1-7QA	0.2364	78	0.2957	16.0365	16.4866	0.393212	4.32378	0.0738531
	0.2364	78	0.3091	16.7632
	0.2364	78	0.3072	16.6602
Rad53-SCD1-12STQA	0.2396	240	0.2451	4.26231	4.35738	0.0907845	1.14277	0.0179536
	0.2396	240	0.2555	4.44317
	0.2396	240	0.2511	4.36665
X-LacZ-NVH	Cell number (OD600)	Total reaction time (min)	OD420	β-galactosidase activity (unit)	Mean	SD	relative LacZ activity	relative LacZ activity SD
LacZ-NVH	0.2317	240	0.1973	3.54805	3.56064	0.0147197	-	-
	0.2317	240	0.1989	3.57682
	0.2317	240	0.1978	3.55704
Sup35-PND	0.2272	55	0.362	28.9693	29.5401	0.498498	8.2963	0.0832207
	0.2272	55	0.3719	29.7615
	0.2272	55	0.3735	29.8896
Sup35-PND-S17A	0.2257	55	0.3141	25.3031	25.381	0.333155	7.12821	0.0566363
	0.2257	55	0.3196	25.7462
	0.2257	55	0.3115	25.0936
Sup35-PND-3SA	0.2223	55	0.2236	18.2881	18.4435	0.174079	5.17984	0.0308154
	0.2223	55	0.2278	18.6317
	0.2223	55	0.2251	18.4108
Sup35-PND-3QA	0.2295	55	0.3517	27.8629	28.5416	0.720035	8.01587	0.11831
	0.2295	55	0.3593	28.465
	0.2295	55	0.3698	29.2969
Sup35-PND-5QA	0.2259	55	0.314	25.2726	24.6851	0.698748	6.93277	0.114503
	0.2259	55	0.309	24.8702
	0.2259	55	0.2971	23.9124
Sup35-PND-8QA	0.236	55	0.3302	25.4391	25.2465	0.27574	7.09045	0.0478064
	0.236	55	0.3293	25.3698
	0.236	55	0.3236	24.9307
Sup35-PND-15SQA	0.2326	93	0.2315	10.7018	10.7342	0.175606	3.01468	0.0293694
	0.2326	93	0.2363	10.9237
	0.2326	93	0.2288	10.577
Sup35-PND-9NA	0.23	63	0.2698	18.6197	18.2977	0.612405	5.13887	0.100055
	0.23	63	0.2707	18.6818
	0.23	63	0.2549	17.5914
Sup35-PND-24SQNA	0.2534	240	-0.0164	-0.269666	-0.259252	0.00991139	-0.0728105	0.00161649
	0.2534	240	-0.0157	-0.258156
	0.2534	240	-0.0152	-0.249934
*β-galactosidase activity(unit) = (1000*OD420)/(Time(min)*OD600)

## Sheet: Figure 5
Figure 5. Quantitative yeast β-galactosidase (LacZ) assays
Figure 5A	Cell number (OD600)	Total reaction time (min)	OD420	β-galactosidase activity (unit)	Mean	SD	P value (compare to LacZ-NVH)
LacZ-NVH	0.2378	240	0.1977	3.46405	3.46288	0.00202323	-
	0.2378	240	0.1977	3.46405
	0.2378	240	0.1975	3.46054
Rad51-NTD-LacZ-NVH	0.2232	45	0.3774	37.5747	39.015	1.25627	1.03652e-06
	0.2232	45	0.4006	39.8845
	0.2232	45	0.3976	39.5858
Rad51-NTD-3SA-LacZ-NVH	0.2163	45	0.3285	33.7494	35.3932	1.43304	2.69268e-06
	0.2163	45	0.3541	36.3795
	0.2163	45	0.3509	36.0508
Rad51-NTD-6SQA-LacZ-NVH	0.2211	45	0.2605	26.1822	26.5273	0.303914	2.00916e-08
	0.2211	45	0.2662	26.7551
	0.2211	45	0.2651	26.6446
Rad51-NTD-9SQA-LacZ-NVH	0.2189	162	0.3088	8.70796	8.78316	0.0656708	1.55002e-08
	0.2189	162	0.3125	8.8123
	0.2189	162	0.3131	8.82922
Rad51-NTD-12SQA-LacZ-NVH	0.241	240	0.2454	4.24274	4.31823	0.0674126	2.5415e-05
	0.241	240	0.2529	4.37241
	0.241	240	0.251	4.33956
Figure 5B	Cell number (OD600)	Total reaction time (min)	OD420	β-galactosidase activity (unit)	Mean	SD	P value (compare to LacZ-NVH)
LacZ-NVH	0.2317	240	0.1973	3.54805	3.56064	0.0147197	-
	0.2317	240	0.1989	3.57682
	0.2317	240	0.1978	3.55704
Sup35-PND-LacZ-NVH	0.2272	55	0.362	28.9693	29.5401	0.498498	9.0457e-08
	0.2272	55	0.3719	29.7615
	0.2272	55	0.3735	29.8896
Sup35-PND-S17A-LacZ-NVH	0.2257	55	0.3141	25.3031	25.381	0.333155	3.6351e-08
	0.2257	55	0.3196	25.7462
	0.2257	55	0.3115	25.0936
Sup35-PND-3SA-LacZ-NVH	0.2223	55	0.2236	18.2881	18.4435	0.174079	1.26532e-08
	0.2223	55	0.2278	18.6317
	0.2223	55	0.2251	18.4108
Sup35-PND-3QA-LacZ-NVH	0.2295	55	0.3517	27.8629	28.5416	0.720035	4.59669e-07
	0.2295	55	0.3593	28.465
	0.2295	55	0.3698	29.2969
Sup35-PND-5QA-LacZ-NVH	0.2259	55	0.314	25.2726	24.6851	0.698748	7.96851e-07
	0.2259	55	0.309	24.8702
	0.2259	55	0.2971	23.9124
Sup35-PND-8QA-LacZ-NVH	0.236	55	0.3302	25.4391	25.2465	0.27574	1.75192e-08
	0.236	55	0.3293	25.3698
	0.236	55	0.3236	24.9307
Sup35-PND-15SQA-LacZ-NVH	0.2326	93	0.2315	10.7018	10.7342	0.175606	2.42455e-07
	0.2326	93	0.2363	10.9237
	0.2326	93	0.2288	10.577
Sup35-PND-9NA-LacZ-NVH	0.23	63	0.2698	18.6197	18.2977	0.612405	1.9827e-06
	0.23	63	0.2707	18.6818
	0.23	63	0.2549	17.5914
Sup35-PND-24SQNA-LacZ-NVH	0.2534	240	-0.0164	-0.269666	-0.259252	0.00991139	3.1049e-10
	0.2534	240	-0.0157	-0.258156
	0.2534	240	-0.0152	-0.249934
Figure 5C	Cell number (OD600)	Total reaction time (min)	OD420	β-galactosidase activity (unit)	Mean	SD	P value (compare to LacZ-NVH)
LacZ-NVH	0.2266	240	0.2035	3.74191	3.81301	0.0667385	-
	0.2266	240	0.2107	3.8743
	0.2266	240	0.2079	3.82282
Rad53-SCD1-LacZ-NVH	0.2387	44	0.2509	23.8889	24.6284	0.651378	6.51364e-07
	0.2387	44	0.2613	24.8791
	0.2387	44	0.2638	25.1171
Rad53-SCD1-5STA-LacZ-NVH	0.2121	78	0.3342	20.2009	20.3601	0.18137	1.24009e-08
	0.2121	78	0.3362	20.3218
	0.2121	78	0.3401	20.5576
Rad53-SCD1-7QA-LacZ-NVH	0.2364	78	0.2957	16.0365	16.4866	0.393212	6.52421e-07
	0.2364	78	0.3091	16.7632
	0.2364	78	0.3072	16.6602
Rad53-SCD1-12STQA-LacZ-NVH	0.2396	240	0.2451	4.26231	4.35738	0.0907845	0.00111533
	0.2396	240	0.2555	4.44317
	0.2396	240	0.2511	4.36665
