# Supplementary figures and images for: Noncanonical usage of stop codons in ciliates expands proteins with structurally flexible Q-rich motifs
Source: eLife journal article supplement (doi:10.7554/elife.91405), 2023-10-25

Figure 3

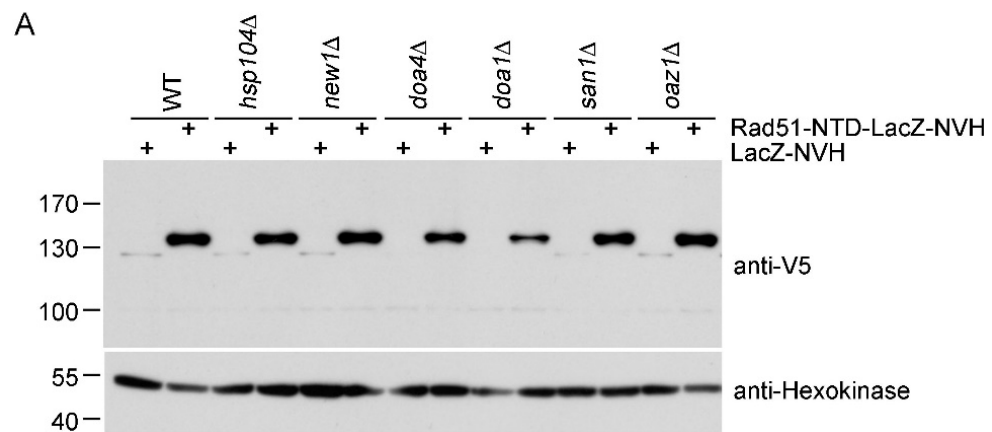

anti-V5

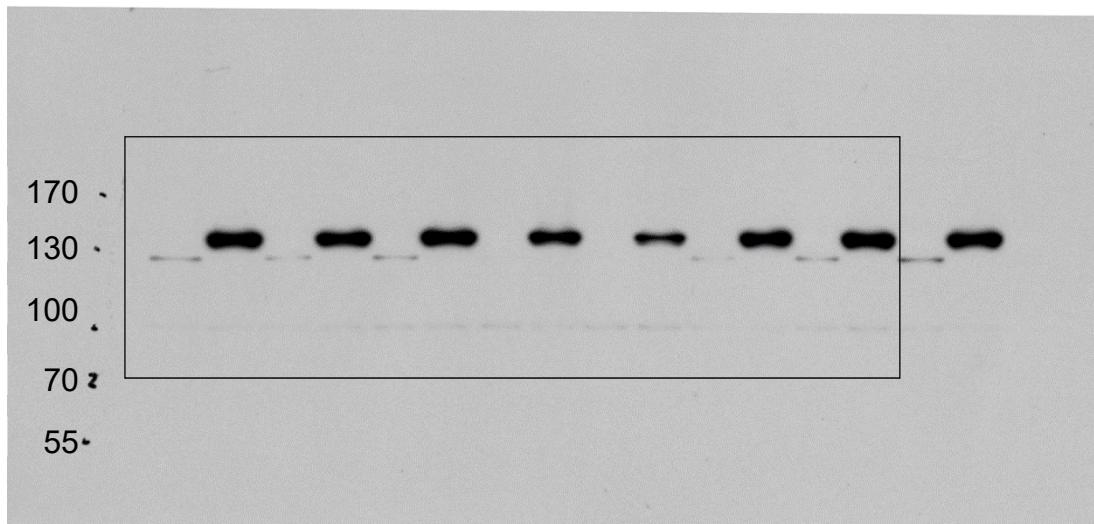

anti-Hexokinase

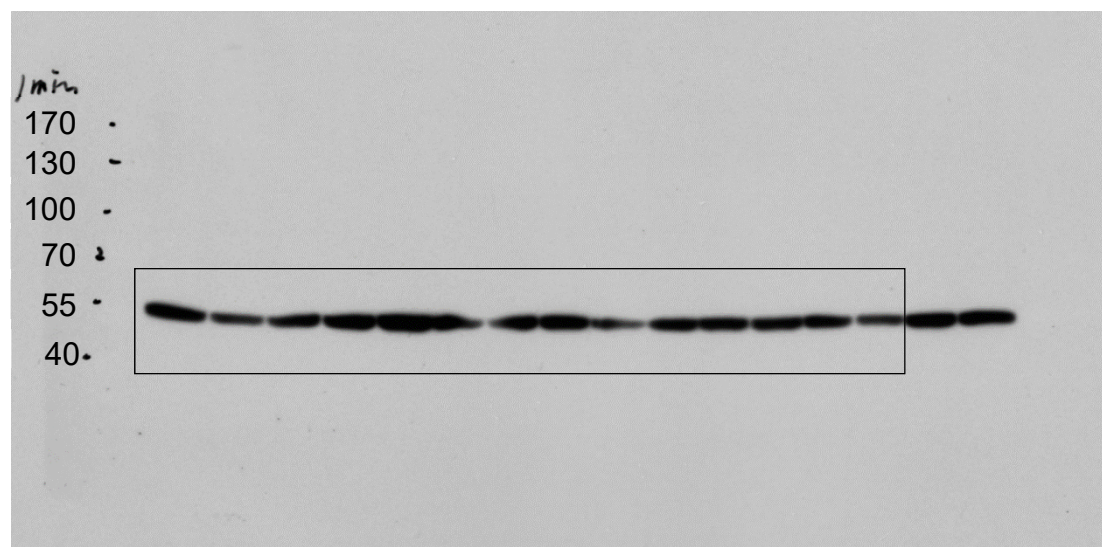

Supplement: fig3-data1 [file elife-91405-fig3-data1-v1.zip]
